# Supplementary material for: A study ofGUPT-2, a water-stable zinc-based metal–organic framework as a highly selective and sensitive fluorescent sensor in the detection of Al3+and Fe3+ions
Source: Royal Society of Chemistry journal article supplement (doi:10.1039/d1ce00323b), 2021-01-01
Supplement: d1ce00323b1.pdf [file d1ce00323b1.pdf]

## Supporting Information

### Study of GUPT-2, a Water-Stable Zinc-based Metal–Organic Framework as a Highly Selective and Sensitive Fluorescence Sensor in the Detection of Al<sup>3+</sup> and Fe<sup>3+</sup> Ions

San-Tai Wang<sup>†,‡</sup>, Xiao Zheng<sup>‡</sup>, Shu-Hua Zhang<sup>†,‡,\*</sup>, Guangzhao Li<sup>†</sup>, Yu Xiao<sup>†,\*</sup>

<sup>†</sup>College of Chemistry, Guangdong University of Petrochemical Technology, Maoming, Guangdong, 525000, People's Republic of China

<sup>‡</sup>Guangxi Key Laboratory of Electrochemical and Magnetochemical Functional Materials(College of Chemistry and Bioengineering), Guilin University of Technology, Guilin 541004, People's Republic of China.

<sup>†</sup>College of Environmental Science and Engineering, Guangdong University of Petrochemical Technology, Maoming, Guangdong, 525000, People's Republic of China

Correspondence author e-mail: E-mail: [zhangshuhua@gdupt.edu.cn](mailto:zhangshuhua@gdupt.edu.cn) (S. Zhang), [Xiaoyu@gdupt.edu.cn](mailto:Xiaoyu@gdupt.edu.cn) (Y. Xiao).

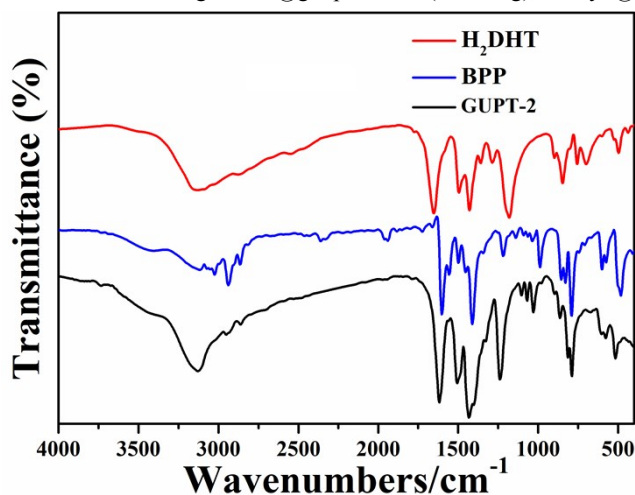

Fig. S1 IR spectra of GUPT-2, H<sub>2</sub>DHT ligand and BPP ligand.

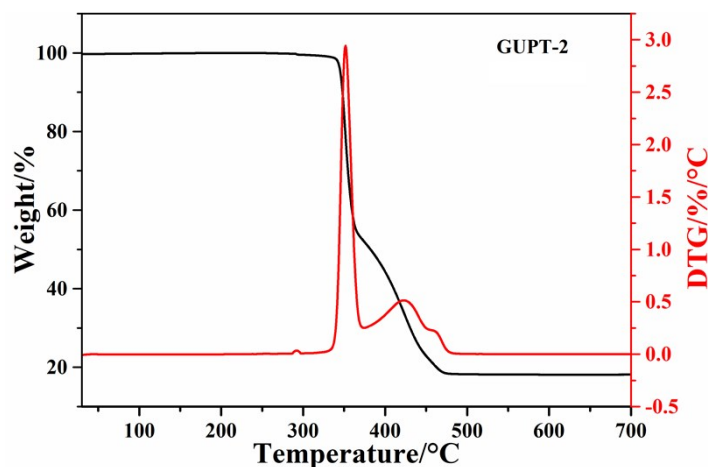

Fig. S2 The TGA and DTG plots of GUPT-2.

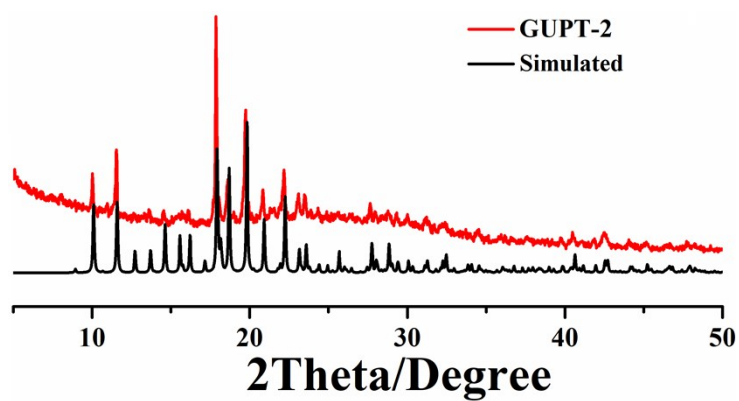

Fig. S3 Powder X-ray diffraction patterns for GUPT-2.

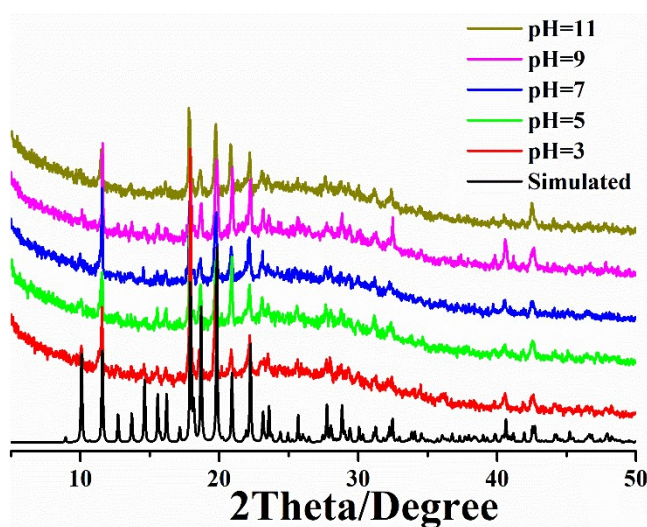

Fig. S4 Powder XRD patterns of GUPT-2 immersed in different pH values.

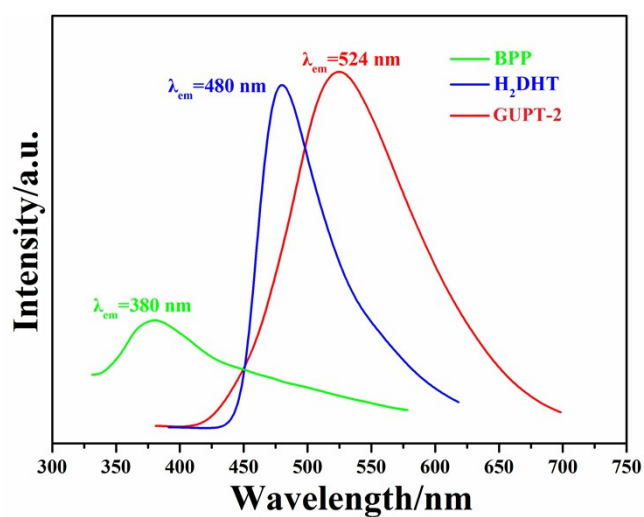

Fig. S5 Solid state emission spectra of GUPT-2, free H<sub>2</sub>DHT ligand and BPP linker upon excitation at 360 nm, 370 nm and 310 nm, respectively.

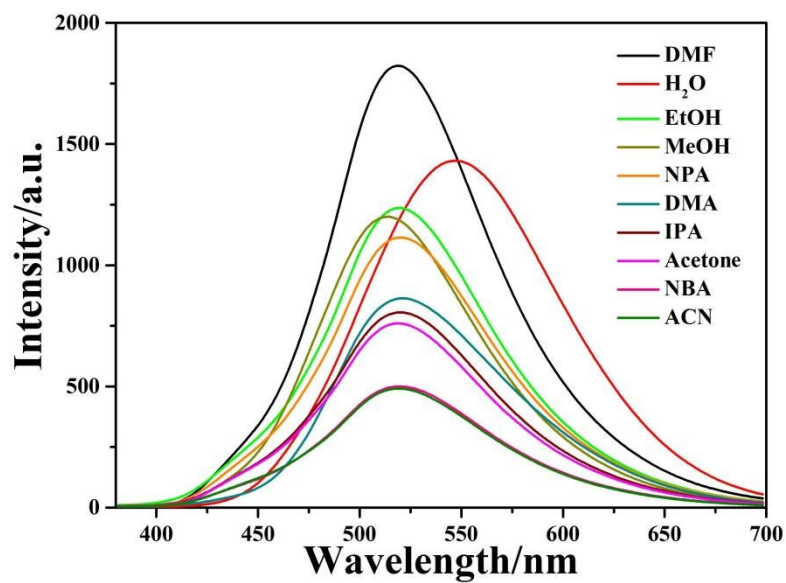

Fig S6 Emission spectra of **GUPT-2** dispersed in different solvents when excited at 360 nm.

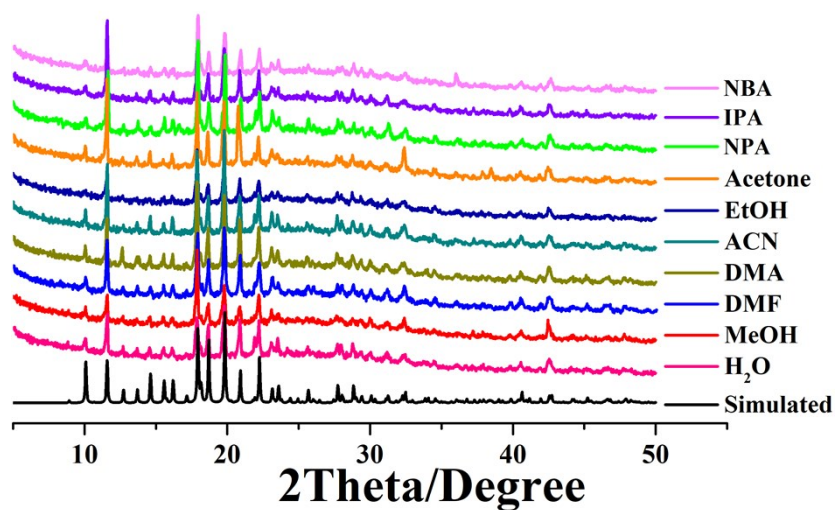

Fig. S7 Powder XRD patterns of **GUPT-2** immersed in different solvents at room temperature.

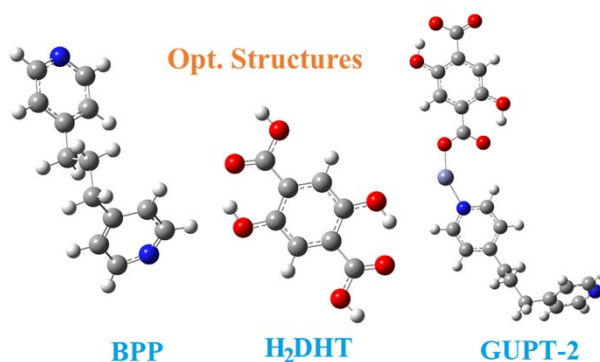

Fig. S8 Optimized structures of BPP linker, H<sub>2</sub>DHT ligand and **GUPT-2**

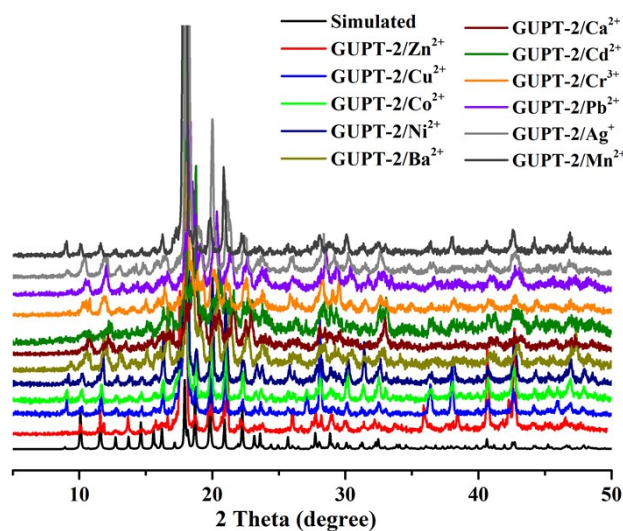

Fig. S9 Powder XRD patterns of GUPT-2 immersed in different metal ions at room temperature.

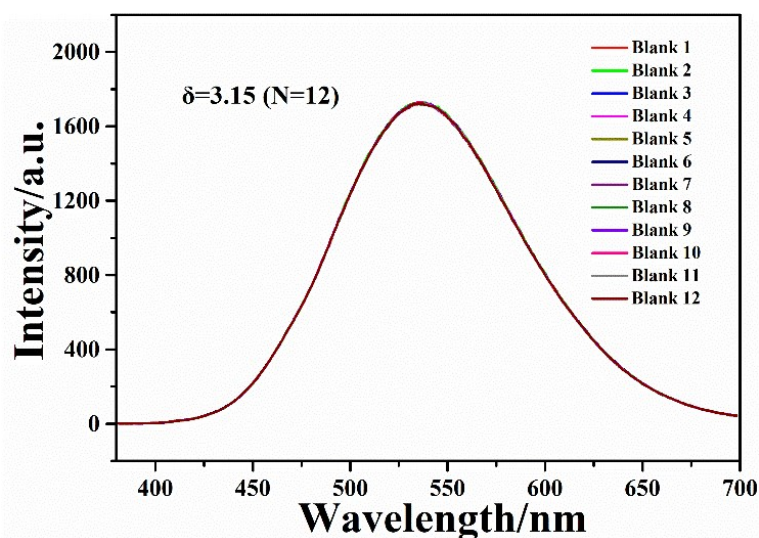

Fig. S10 The fluorescence spectra of blank GUPT-2 ( $1 \text{ mg} \cdot \text{mL}^{-1}$ ) at different measurements.

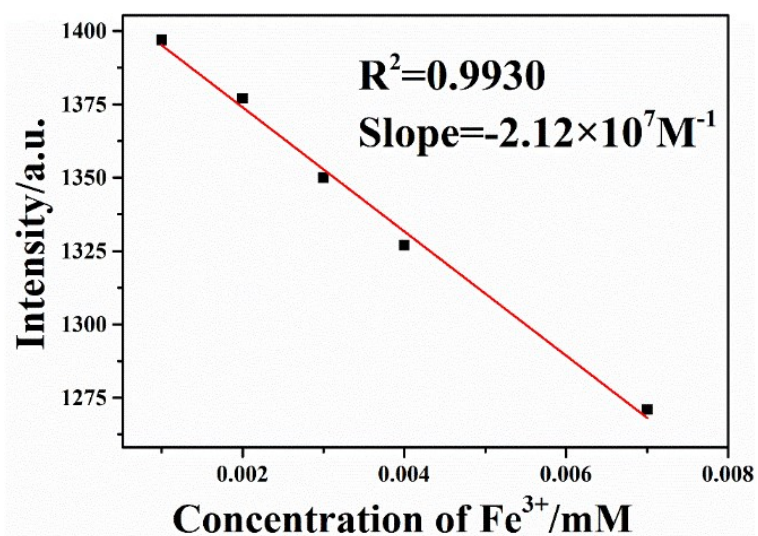

Linear Equation:  $Y = -21169X + 1416.38$

$R^2 = 0.9930$

Slope =  $-2.12 \times 10^7 \text{ M}^{-1}$

$\delta = 3.15$  (N=12)

Limit detection =  $3\delta/\text{Slope} = 0.446 \mu\text{M}$

Fig. S11 The fitting curve of the luminescence intensity of **GUPT-2** at different  $\text{Fe}^{3+}$  concentration

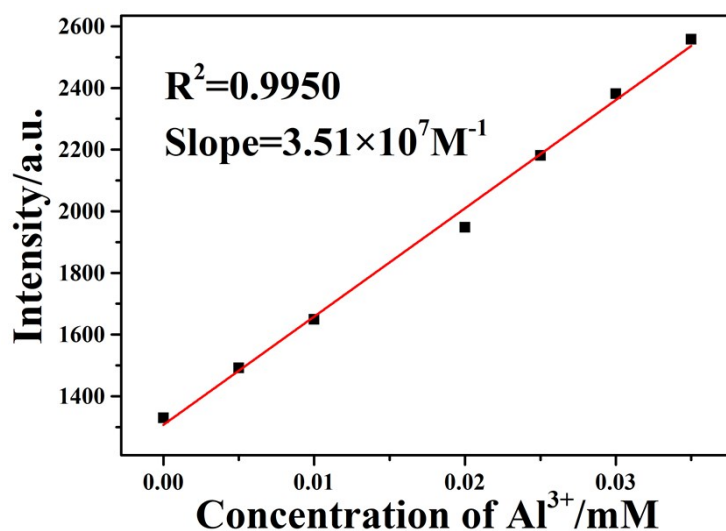

Linear Equation:  $Y = 35121X + 1306.96$

$R = 0.9950$

Slope =  $3.51 \times 10^7 \text{ M}^{-1}$

$\delta = 3.15$  (N=12)

Limit detection =  $3\delta/\text{Slope} = 0.269 \mu\text{M}$

Fig. S12 The fitting curve of the luminescence intensity of **GUPT-2** at different  $\text{Al}^{3+}$  concentration

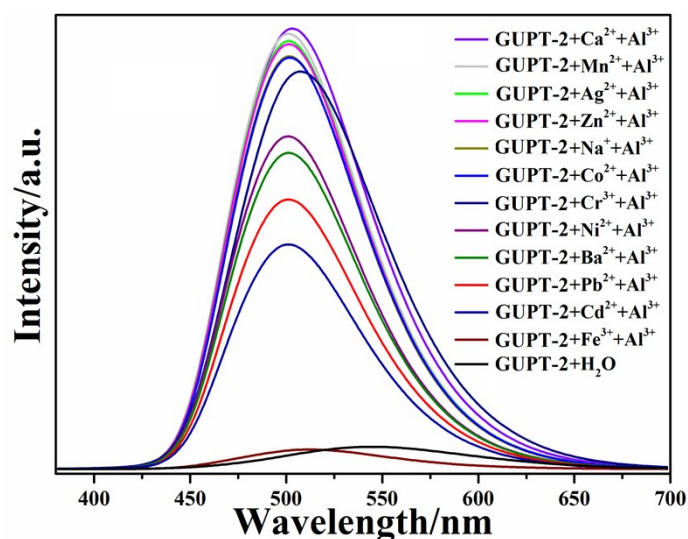

Fig. S13 The luminescence of intensity of interacting with different metal ions in water solution with and without  $\text{Al}^{3+}$  ions.



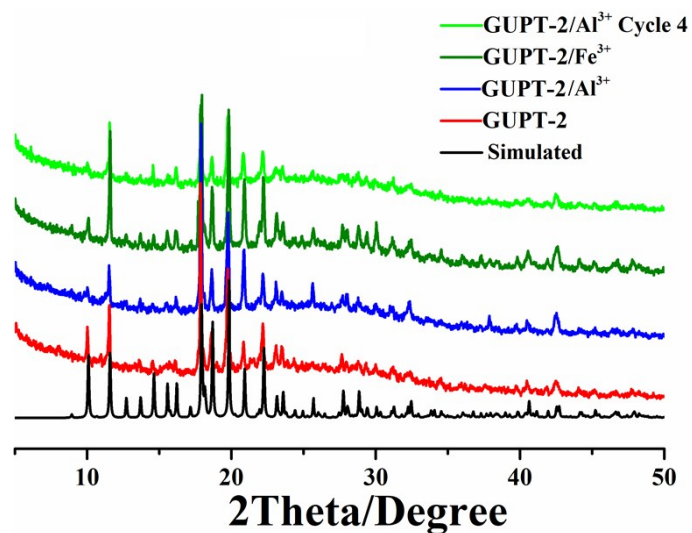

Fig. S14 Powder XRD patterns of simulated from the single-crystal data of **GUPT-2**, synthesized compound and **GUPT-2/M<sup>n+</sup>**

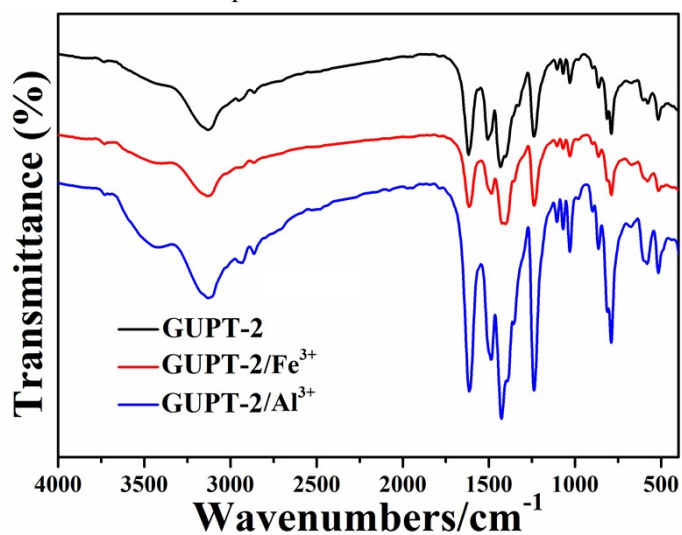

Fig. S15 IR spectra of Zn-MOF/Al<sup>3+</sup> and Zn-MOF, respectively.

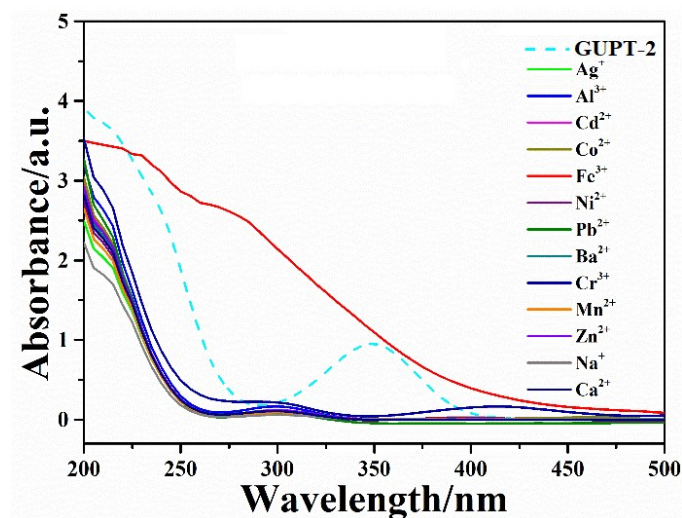

Fig. S16 UV-vis adsorption spectra of metal ions in water (10<sup>-3</sup> mol/L) and the excitation spectrum of **GUPT-2** dispersed in aqueous solution.

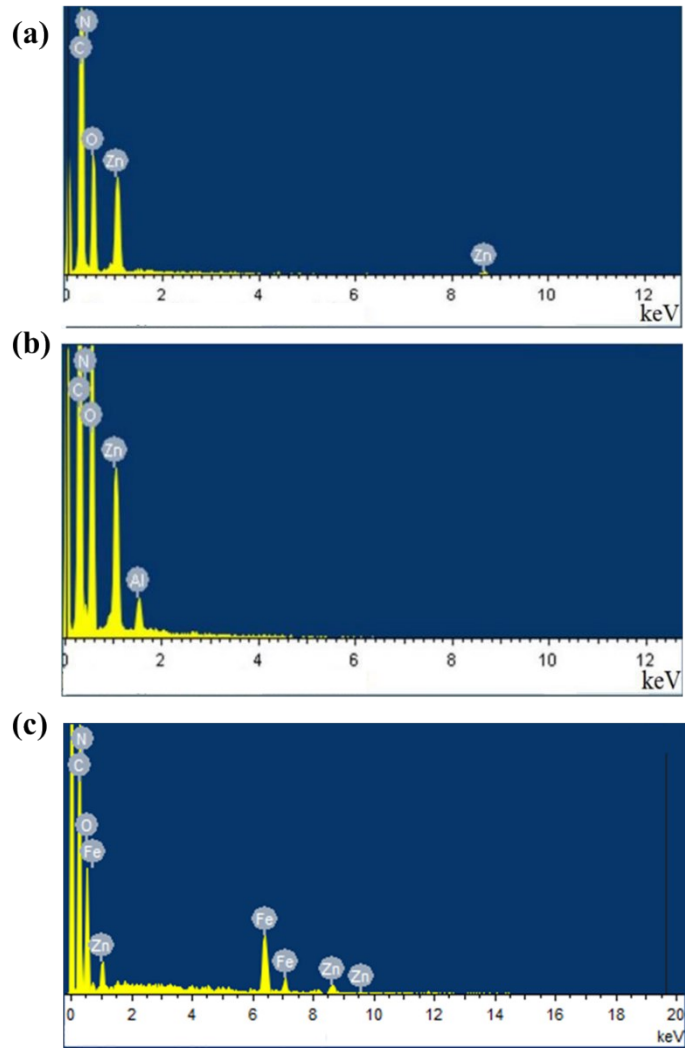

Fig. S17 EDS spectra of **GUPT-2** before (a) and after the sensing of  $\text{Al}^{3+}$ (b) and  $\text{Fe}^{3+}$ (c).

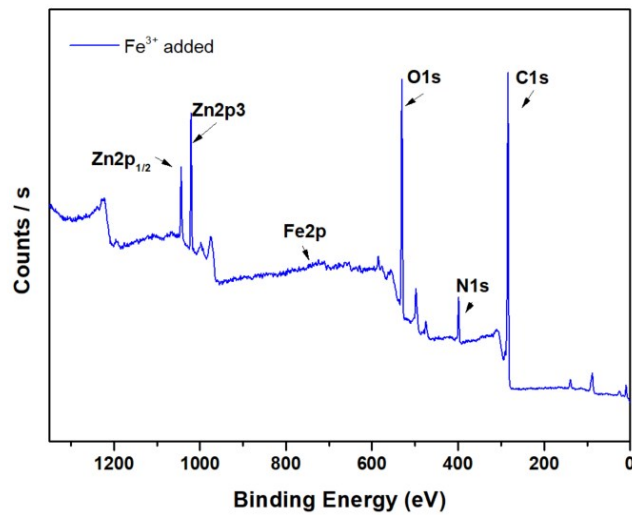

Fig. S18 XPS spectra of **GUPT-2** after the sensing of  $\text{Fe}^{3+}$ .

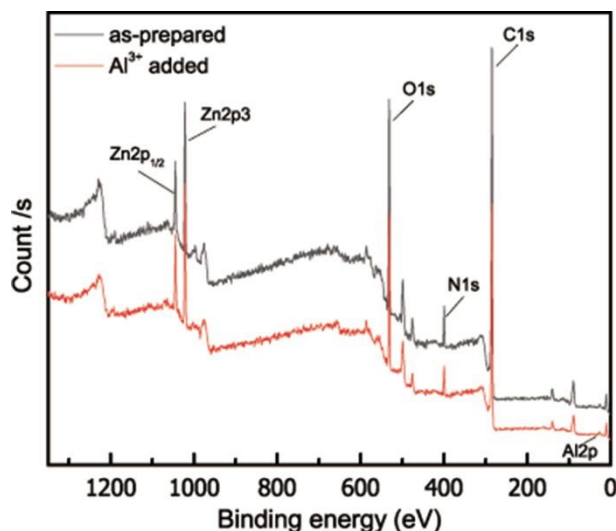

Fig. S19 XPS spectra of **GUPT-2** after the sensing of  $\text{Al}^{3+}$ .

Table S1 Selected bond lengths ( $\text{\AA}$ ) and angles ( $^\circ$ ) for **GUPT-2**.

|           |            |             |            |
|-----------|------------|-------------|------------|
| Zn1–N1    | 2.056(4)   | O2–Zn1–O5A  | 142.5(3)   |
| Zn1–O2    | 1.950(3)   | O2–Zn1–N2B  | 97.25(16)  |
| Zn1–O5A   | 1.973(6)   | O5A–Zn1–N1  | 91.4(2)    |
| Zn1–N2B   | 2.041(4)   | O5A–Zn1–N2B | 109.1(2)   |
| O2–Zn1–N1 | 106.19(16) | N2B–Zn1–N1  | 106.94(18) |

Symmetry codes: (A)  $x, -y+1/2, z+1/2$ ; (B)  $x-1, y, z$ .

Table S2 Hydrogen bond parameters for **GUPT-2**

| D–H $\cdots$ A          | d(D–H) | d(D $\cdots$ A) | d(H $\cdots$ A) | $\angle(\text{DHA})$ |
|-------------------------|--------|-----------------|-----------------|----------------------|
| O(3)–H(3) $\cdots$ O(1) | 0.82   | 2.572(7)        | 1.84            | 147                  |
| O(4)–H(4) $\cdots$ O(6) | 0.82   | 2.526(8)        | 1.79            | 148                  |

Table S3 TD-DFT calculated main emission energies (nm) and electronic transitions of **GUPT-2**,  $\text{H}_2\text{DHT}$  and **BPP** ligands.

| Compounds              | Calcd. $\lambda$ (nm) | Exp. $\lambda$ (nm) | Significant contributions /Osc. Strengths (f) |
|------------------------|-----------------------|---------------------|-----------------------------------------------|
| <b>GUPT-2</b>          | 491                   | 524                 | HOMO $\rightarrow$ LUMO+1 (99.8%)/0.1839      |
| $\text{H}_2\text{DHT}$ | 487                   | 480                 | HOMO $\rightarrow$ LUMO (99%) / 0.1561        |
| <b>BPP</b>             | 350                   | 380                 | HOMO $\rightarrow$ LUMO (98.7%)               |

Table S4 Highly Occupied and Lowest Unoccupied Molecular Orbitals for all ligands involved in the main luminescent charge transitions.

| <b>H<sub>2</sub>DHT</b> |             | <b>BPP</b> |             |
|-------------------------|-------------|------------|-------------|
| MO's                    | Energy (eV) | MO's       | Energy (eV) |



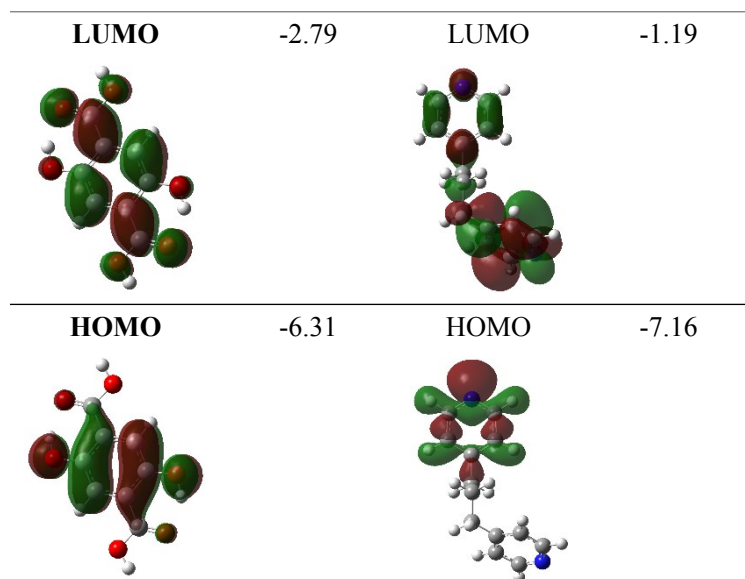

Table S5 Vertical excitation energies ( $E_{\text{exc}}$ ), oscillator strengths ( $f$ ), and Key transitions of the lowest few excited singlets obtained from TDDFT calculations of **GUPT-2**.

| $E_{\text{excitation}}$<br>(eV) | excitation<br>(nm) | Osc.<br>Strength ( $f$ ) | Key transitions | Orbital<br>contribution |
|---------------------------------|--------------------|--------------------------|-----------------|-------------------------|
| 3.4305                          | 361.42             | 0.1202                   | HOMO→LUMO       | 0.040                   |
|                                 |                    |                          | HOMO→LUMO+1     | 0.941                   |
| 5.0392                          | 246.04             | 0.3006                   | HOMO-5→LUMO+1   | 0.77                    |
|                                 |                    |                          | HOMO-2→LUMO+2   | 0.05                    |
|                                 |                    |                          | HOMO→LUMO+5     | 0.12                    |
| 5.3207                          | 233.02             | 0.1331                   | HOMO-8→LUMO     | 0.46                    |
|                                 |                    |                          | HOMO-5→LUMO+2   | 0.05                    |
|                                 |                    |                          | HOMO→LUMO+6     | 0.32                    |
|                                 |                    |                          | HOMO→LUMO+7     | 0.10                    |
|                                 |                    |                          | HOMO→LUMO+8     | 0.02                    |
| 5.8060                          | 213.54             | 0.1844                   | HOMO-11→LUMO+1  | 0.05                    |
|                                 |                    |                          | HOMO-5→LUMO+1   | 0.03                    |
|                                 |                    |                          | HOMO→LUMO+6     | 0.05                    |
|                                 |                    |                          | HOMO→LUMO+7     | 0.51                    |
|                                 |                    |                          | HOMO→LUMO+8     | 0.31                    |

Table S6 The energy values of some HOMO-LUMO of **GUPT-2**.

| MO's   | Energy (eV) |
|--------|-------------|
| LUMO+5 | -0.41       |
| LUMO+4 | -0.75       |
| LUMO+3 | -0.97       |
| LUMO+2 | -1.11       |
| LUMO+1 | -1.50       |
| LUMO   | -1.72       |
| HOMO   | -5.40       |
| HOMO-1 | -6.18       |

|        |       |
|--------|-------|
| HOMO-2 | -6.46 |
| HOMO-3 | -6.52 |
| HOMO-4 | -6.93 |
| HOMO-5 | -6.98 |

Table S7 Some HOMO and LUMO of **GUPT-2**.

|        |                                                                                     |        |                                                                                       |
|--------|-------------------------------------------------------------------------------------|--------|---------------------------------------------------------------------------------------|
| HOMO   | 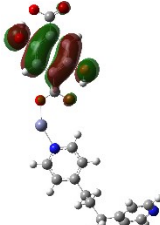   | LUMO+5 |    |
| HOMO-1 |    | LUMO+4 |    |
| HOMO-2 |   | LUMO+3 |   |
| HOMO-3 |  | LUMO+2 |  |
| HOMO-4 |  | LUMO+1 |  |
| HOMO-5 |  | LUMO   |  |

Table S8 Comparison of the performance of various MOF sensors for Al<sup>3+</sup> and Fe<sup>3+</sup> ions.

| Metals           | Materials                                                                                                                      | Solvents     | K <sub>sv</sub> (M <sup>-1</sup> ) | LOD(μM)      | References       |
|------------------|--------------------------------------------------------------------------------------------------------------------------------|--------------|------------------------------------|--------------|------------------|
| Al <sup>3+</sup> | {[H <sub>3</sub> O] <sub>2</sub> [Eu <sub>2.5</sub> (BTB) <sub>3</sub> (OAc) <sub>0.5</sub> (H <sub>2</sub> O) <sub>3</sub> ]} | DMF          | 5.57×10 <sup>4</sup>               | 100          | [1]              |
|                  | UiO-66-NH <sub>2</sub> -SA                                                                                                     | Water        | -                                  | 6.98         | [2]              |
|                  | [Co <sub>2</sub> (dmimpym)(nda) <sub>2</sub> ] <sub>n</sub>                                                                    | Water        | 1.1×10 <sup>4</sup>                | 0.7          | [3]              |
|                  | [Cd(CDC)(L)] <sub>n</sub>                                                                                                      | Water        | 2.6×10 <sup>3</sup>                | 61           | [4]              |
|                  | [Cd(PAM)(4-bpbd)1.5]·DMF                                                                                                       | Water        | 2.3×10 <sup>4</sup>                | 7.41         | [5]              |
|                  | Zn(DMA)(TBA)                                                                                                                   | Water        | -1.3×10 <sup>4</sup>               | 1.97         | [6]              |
|                  | [Eu <sub>2</sub> (ppda) <sub>2</sub> (npdc)(H <sub>2</sub> O)]·H <sub>2</sub> O                                                | Water        | 8.68×10 <sup>5</sup>               | 109          | [7]              |
|                  | <b>GUPT-2</b>                                                                                                                  | <b>Water</b> | <b>-1.21×10<sup>4</sup></b>        | <b>0.269</b> | <b>This work</b> |
| Fe <sup>3+</sup> | [Eu <sub>2</sub> (FDC) <sub>3</sub> DMA(H <sub>2</sub> O) <sub>3</sub> ]·DMA·4.5H <sub>2</sub> O                               | Water        | 1.1×10 <sup>4</sup>                | 2.22         | [8]              |
|                  | [Zn <sub>2</sub> (BDC) <sub>2</sub> (4-bpdh)]·3DMF                                                                             | DMF          | 2.8×10 <sup>4</sup>                | 0.2          | [9]              |
|                  | {[Cd(L)(SDBA)(H <sub>2</sub> O)]·0.5H <sub>2</sub> O} <sub>n</sub>                                                             | Water        | 3.59×10 <sup>4</sup>               | 7.14         | [10]             |
|                  | {[Co <sub>3</sub> (phen) <sub>2</sub> (HL) <sub>2</sub> ]·(H <sub>2</sub> O) <sub>2</sub> } <sub>n</sub>                       | Water        | 8.5×10 <sup>3</sup>                | 1.79         | [11]             |
|                  | [Zr <sub>6</sub> O <sub>4</sub> (OH) <sub>8</sub> (H <sub>2</sub> O) <sub>4</sub> (L <sup>1</sup> ) <sub>2</sub> ]             | Water        | 2.17×10 <sup>3</sup>               | 3.79         | [12]             |
|                  | Eu <sup>3+</sup> @Zn-MOF                                                                                                       | Water        | 1.9×10 <sup>4</sup>                | 2            | [13]             |
|                  | [Cd <sub>2</sub> (pbdc)(H <sub>2</sub> O) <sub>3</sub> ]                                                                       | Water        | 1.86×10 <sup>5</sup>               | 0.167        | [14]             |
|                  | <b>GUPT-2</b>                                                                                                                  | <b>Water</b> | <b>1.77×10<sup>4</sup></b>         | <b>0.446</b> | <b>This work</b> |

## Notes and references

- [1] H. Xu, M. Fang, C.-S. Cao, W.-Z. Qiao, B. Zhao, *Inorg. Chem.* 55(10) (2016) 4790-4794.
- [2] S.-Y. Zhu, B. Yan, *Dalton Trans.* 47 (2018) 1674-1681
- [3] W.-M. Chen, X.-L. Meng, G.-L. Zhuang, Z. Wang, M. Kurmoo, Q.-Q. Zhao, X.-P. Wang, B. Shan, C.-H. Tung, D. Sun, *J. Mater. Chem. A*, 5(25) (2017) 13079-13085.
- [4] S. Chand, M. Mondal, S.-C. Pal, A. Pal, S. Maji, D. Mandal, M.-C. Das, *New J. Chem.* 42(15) (2018) 12865-12871.
- [5] R. Lv, Z. Chen, X. Fu, B. Yang, H. Li, J. Su, W. Gu, X. Liu, *J. Solid State Chem.* 259 (2018) 67-72.
- [6] X. Zhang, X. Luo, N. Zhang, J. Wu, Y. Huang, *Inorg. Chem. Front.* 4 (2017) 1888-1894
- [7] Z. Zhan, X. Liang, X. Zhang, Y. Jia, M. Hu, *Dalton trans.* 48(5) (2019) 1786-1794.
- [8] L. Li, Q. Chen, Z. Niu, X. Zhou, T. Yang, W. Huang, *J. Mater. Chem. C* 4(9) (2016) 1900-1905.
- [9] Y.-D. Farahani, V. Safarifard, *J. Solid State Chem.* 275 (2019) 131-140.
- [10] S. Chen, Z. Shi, L. Qin, H. Jia, H. Zheng, *Cryst. Growth Des.* 17(1) (2016) 67-72.
- [11] Y. Liu, C. Liu, X. Zhang, L. Liu, C. Ge, X. Zhuang, N. Zhang, Q. Yang, Y.-Q. Huang, Z. Zhang, *J. Solid State Chem.* 272 (2019) 1-8.
- [12] B. Wang, Q. Yang, C. Guo, Y. Sun, L.-H. Xie, J.-R. Li, *ACS Appl. Mater. Interfaces* 9(11) (2017)

10286-10295.

[13] R. Lv, H. Li, J. Su, X. Fu, B. Yang, W. Gu, X. Liu, *Inorg. Chem.* 56(20) (2017) 12348-12356.

[14] C. Zhang, H. Shi, L. Sun, Y. Yan, B. Wang, Z. Liang, L. Wang, J. Li, *Cryst. Growth Des.* 18(12) (2018) 7683-7689.
